# Supplementary material for: The Platonia insignis Mart. as the Promising Brazilian ‘Amazon Gold’: The State-of-the-Art and Prospects
Source: MDPI journal article supplement (doi:10.3390/agriculture12111827), 2022-11-01
Supplement: s1 [file s1]

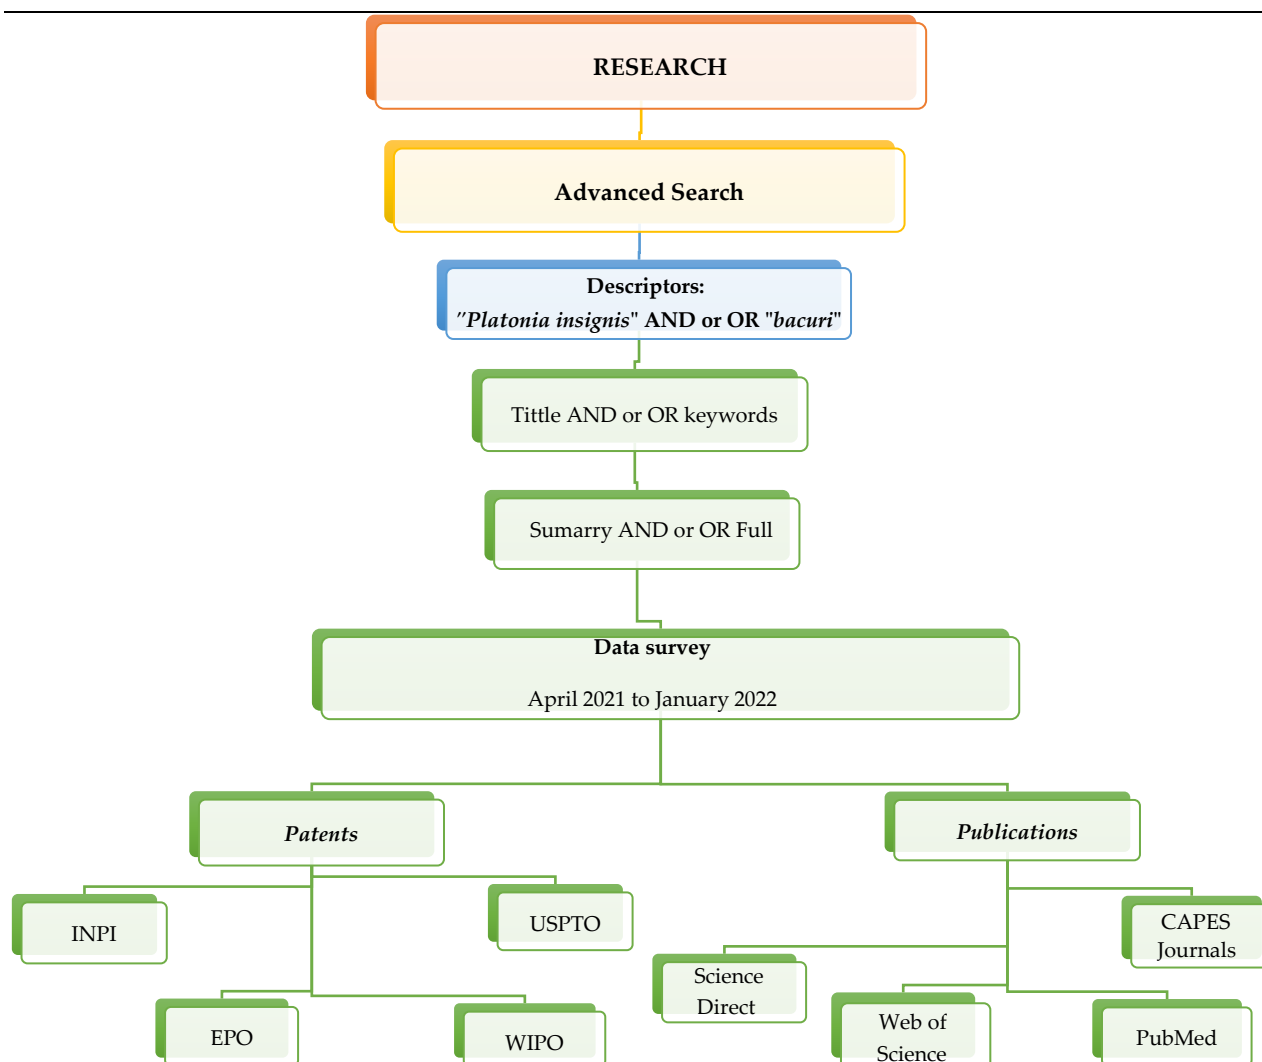

**Supplementary Figure S1.** Search strategy, period and steps followed for database analysis. INPI: *Instituto Nacional da Propriedade Intelectual* (in Portuguese); USPTO: United States Patent and Trademark Office; EPO: European Patent Office; WIPO: The World Intellectual Property Organization; CAPES: *Coordenação de Aperfeiçoamento de Pessoal de Nível Superior* (in Portuguese).

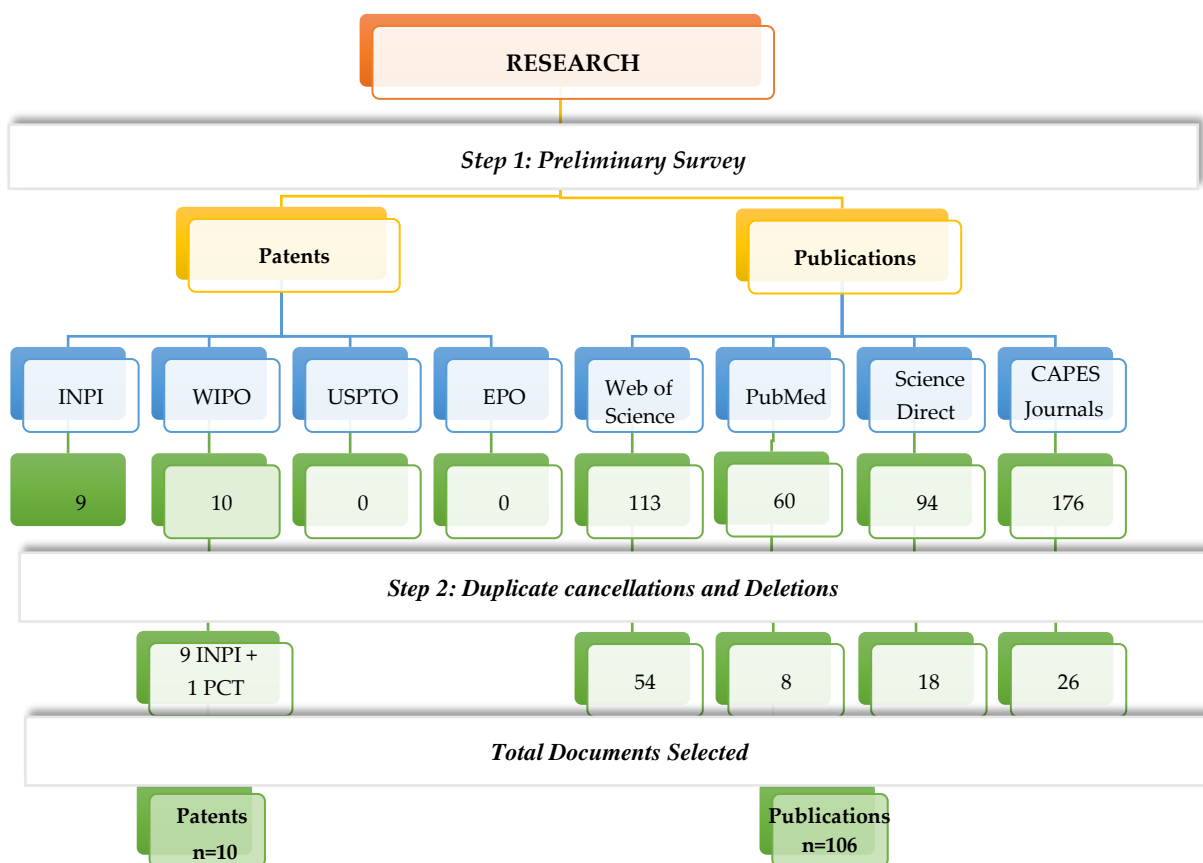

**Supplementary Figure S2.** Quantitative results of research and analysis of publications and patents. INPI: *Instituto Nacional da Propriedade Intelectual* (in Portuguese); USPTO: United States Patent and Trademark Office; EPO: European Patent Office; WIPO: The World Intellectual Property Organization; CAPES: *Coordenação de Aperfeiçoamento de Pessoal de Nível Superior* (in Portuguese).

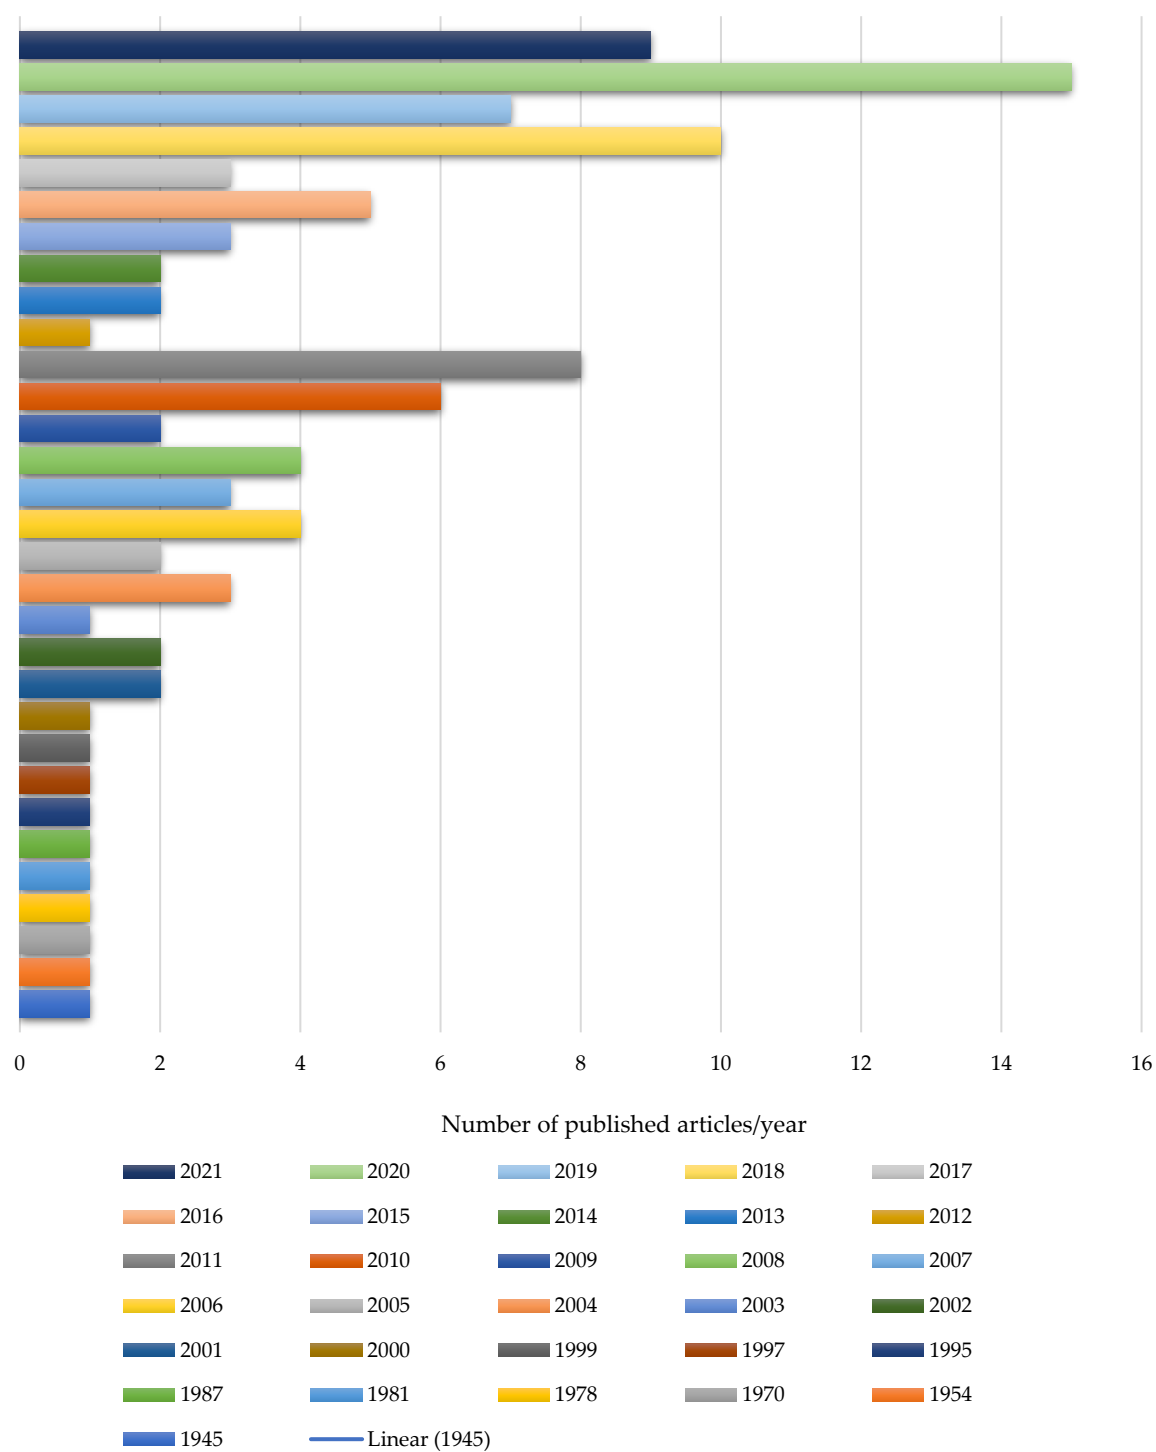

**Supplementary Figure S3.** Distribution of scientific articles related to *Platonina insignis* by year of publication.

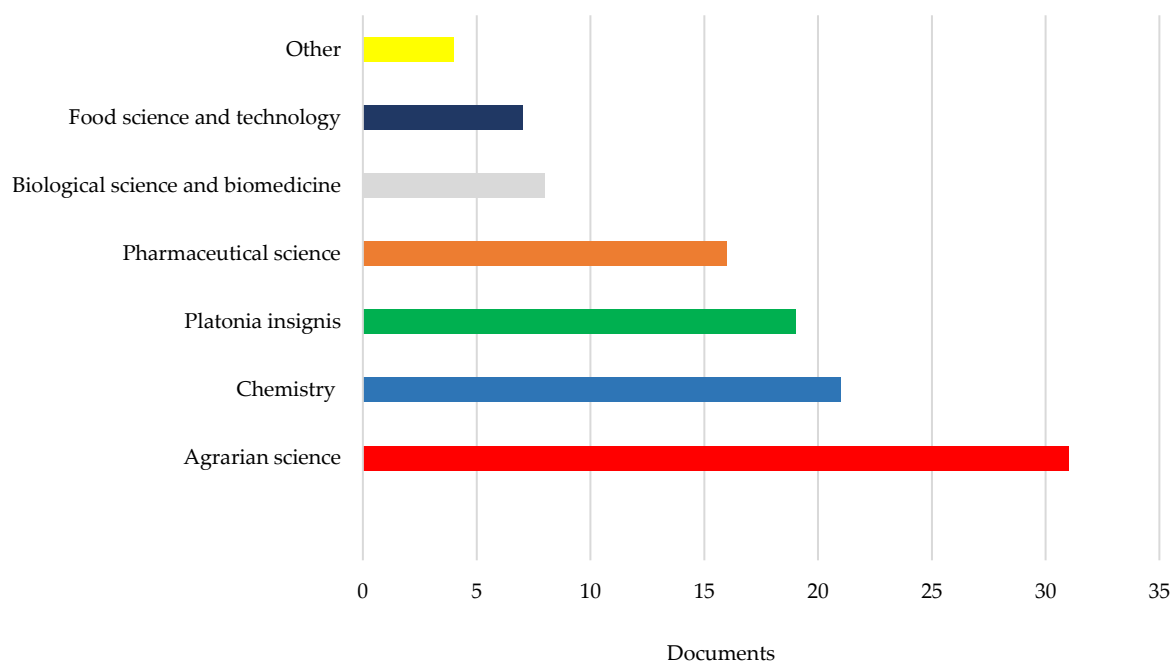

**Supplementary Figure S4.** Major Study Focus Areas for *Platonina insignis* Mart.
